# Supplementary material for: A novel near-infrared probe for the imaging of superoxide anion fluctuations and hydrogen ion enhancement in vivo
Source: Royal Society of Chemistry journal article supplement (doi:10.1039/c8ay01190g), 2018-01-01
Supplement: c8ay01190g1.pdf [file c8ay01190g1.pdf]

## Supplementary Information

### **A novel near-infrared probe for imaging of superoxide anions fluctuations and hydrogen ions enhancement in vivo**

Chunlong Sun<sup>a\*</sup>, Wen Du<sup>a(\*\*)</sup>, Wei Zhang<sup>b</sup>, Yang Wu<sup>c</sup>, Zhigang Yao<sup>a</sup>,  
Baoqin Wang<sup>a</sup>, Tao Wu<sup>a</sup>, Hongjun Yang<sup>a</sup>, YanMei Wang<sup>a</sup>, Lili Ren<sup>a</sup>

*<sup>a</sup> College of Biological and Environmental Engineering & Shandong Provincial Key Laboratory of Eco-environmental Science for Yellow River Delta & Shandong Provincial Engineering and Technology Research Center for Wild Plant Resources Development and Application of Yellow River Delta, Binzhou University, Binzhou 256603, China*

*<sup>b</sup> Department of General Surgery, the First Affiliated Hospital with Nanjing Medical University, Nanjing 210029, China*

*<sup>c</sup> Research Center of Clinical Oncology, Jiangsu Cancer Hospital & Jiangsu Institute of Cancer Research & The Affiliated Cancer Hospital of Nanjing Medical University, Nanjing 210009, China*

---

\*Corresponding author. Tel.: +86-0543-3190096; E-mail address: sunchunlong2016@163.com (Chunlong Sun)

\*\* Corresponding author. Tel.: +86-0543-3190096; E-mail address: duwen6688@163.com (Wen Du)

## 1. Preparation of test solutions

Test solutions of IR-747-SAPH (10  $\mu\text{M}$ ) in pH 7.4 phosphate-buffered saline (PBS) (containing 1% DMSO) were prepared. Solutions of various test species were prepared by diluting the stock solution with PBS buffer solution. Different anions were prepared with metal ions forming  $\text{ZnCl}_2$ ,  $\text{MgSO}_4$ ,  $\text{CuCl}_2$ ,  $\text{CuNO}_3$ ,  $\text{FeCl}_3$ , and  $\text{FeCl}_2$ . Various ROS, including  $\text{ClO}^-$ ,  $\bullet\text{OH}$ ,  $\text{O}_2^{\bullet-}$ ,  $^1\text{O}_2$ ,  $\bullet\text{NO}$ ,  $\text{H}_2\text{O}_2$ , and  $\text{ONOO}^-$ , were prepared according to a previously reported procedure.

## 2. Design and Synthesis of the probe IR-747-SAPH

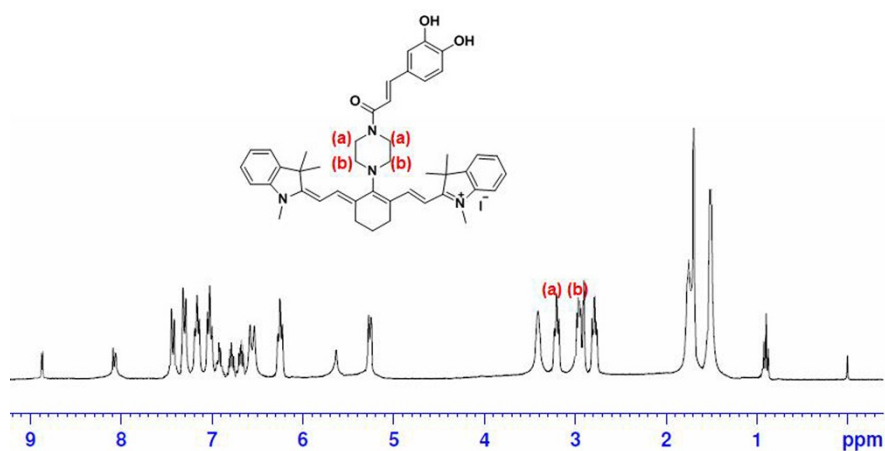

A

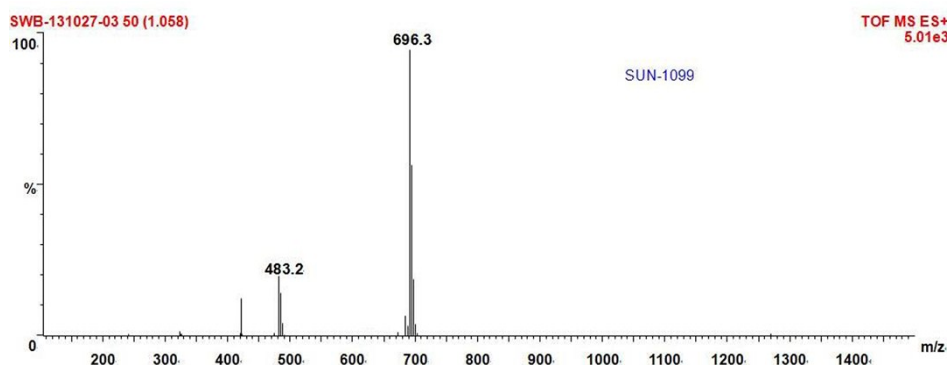

B

IR-747-SAPH C13-NMR DMSO-d6 300k AV-300

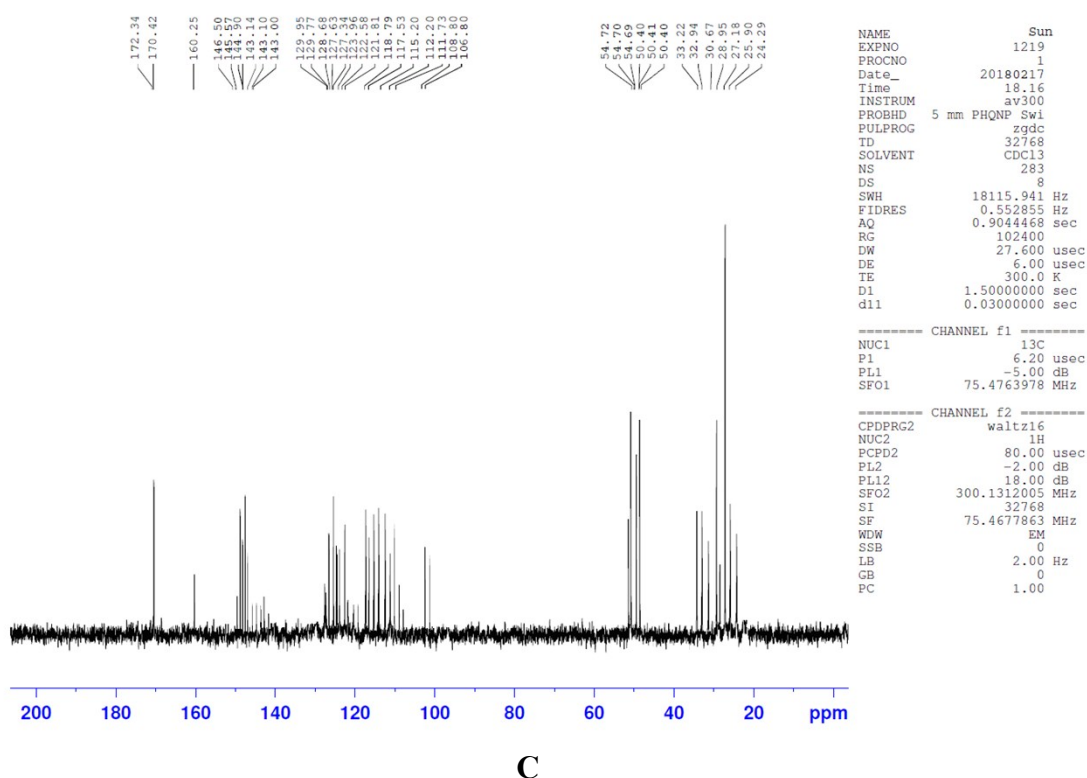

**Figure S1.**  $^1\text{H}$  NMR(A), MS(B) and  $^{13}\text{C}$  NMR(C) spectra of IR-747-SAPH in DMSO- $d_6$
